# Supplementary material for: Assessment of the Interatomic Potentials of Beryllium for Mechanical Properties
Source: MDPI journal article supplement (doi:10.3390/cryst13091330), 2023-08-30
Supplement: s1 [file s1]

# Supplementary Information

## Assessment of the interatomic potentials of beryllium for mechanical properties

Chengzhi Yang <sup>1</sup>, Bin Wu <sup>2,\*</sup>, Wenmin Deng <sup>1</sup>, Shuzhen Li <sup>1</sup>, Jianfeng Jin<sup>3</sup>,  
and Qing Peng <sup>4,5,6\*</sup>

1. Department of Physics, Beijing Normal University, Beijing 100875, China;

2. College of Nuclear Science and Technology, Beijing Normal University, Beijing 100875,  
China;

3. School of Materials Science and Engineering, Northeastern University, Shenyang 110819,  
China

4. State Key Laboratory of Nonlinear Mechanics, Institute of Mechanics, Chinese Academy of  
Sciences, Beijing 100190, China;

5. School of Engineering Sciences, University of Chinese Academy of Sciences, Beijing 100049,  
China;

6. Physics Department, King Fahd University of Petroleum & Minerals, Dhahran 31261, Saudi  
Arabia;

\*. Correspondences: bwu6@bnu.edu.cn (B.W.); pengqing@imech.ac.cn (Q.P.)

## Contents

**Table S1.** The parameters of MEAM type potential developed for beryllium.

**Table S2.** The parameters of Tersoff type potential developed for beryllium.

**Table S3.** The parameters of the Finnis-Sinclair type potential developed for beryllium.

**Table S4.** Effect of void size of spherical void on the mechanical performance of beryllium subject to uniaxial tension. The interatomic potential used is the MEAM potential.

**Table S5.** Effect of temperature on the mechanical performance of beryllium subject to uniaxial tension. The interatomic potential used is the MEAM potential.

**Table S6.** Effect of void size of spherical void on the mechanical performance of beryllium subject to uniaxial tension. The interatomic potential used is the Tersoff potential.

**Table S7.** Effect of temperature on the mechanical performance of beryllium subject to uniaxial tension. The interatomic potential used is the Tersoff potential.

**Table S8.** Effect of void size of spherical void on the mechanical performance of beryllium subject to uniaxial tension. The interatomic potential used is the Finnis-Sinclair potential.

**Table S9.** Effect of temperature on the mechanical performance of beryllium subject to uniaxial tension. The interatomic potential used is the Finnis-Sinclair potential.

## Supplementary Tables

**Table S1.** The parameters of MEAM type potential developed for beryllium.

| $r_{cut}$ | $\alpha$ | $\beta^{(0)}$ | $\beta^{(1)}$ | $\beta^{(2)}$ | $\beta^{(3)}$           |
|-----------|----------|---------------|---------------|---------------|-------------------------|
| 3.5       | 3.8501   | 0.24826       | 0.004161      | 0.33524       | $3.8426 \times 10^{-7}$ |
| $r_e$     | $E_c$    | $A$           | $t^{(0)}$     | $t^{(1)}$     | $t^{(2)}$               |
| 2.2433361 | 3.42     | 1.1801        | 1.0           | 4.5561        | 21.956                  |
| $t^{(3)}$ | $\delta$ | $C_{min}$     | $C_{max}$     |               |                         |
| -10.234   | 0.01     | 1.1           | 1.5           |               |                         |

**Table S2.** The parameters of Tersoff type potential developed for beryllium.

| $R$ (Å)                    | $D$ (Å) | $A$         | $B$    | $\lambda_1$ | $\lambda_2$            | $n$            |
|----------------------------|---------|-------------|--------|-------------|------------------------|----------------|
| 2.685                      | 0.223   | 367.830     | 13.915 | 3.193       | 1.026                  | 1.0            |
| $\beta$ (Å <sup>-1</sup> ) | $m$     | $\lambda_3$ | $c$    | $d$         | $\gamma$               | $\cos\theta_0$ |
| 1.0                        | 1.0     | 1.7         | 32.328 | 0.053       | $4.787 \times 10^{-7}$ | -0.827         |

**Table S3.** The parameters of the Finnis-Sinclair type potential developed for beryllium.

| $r_{a1}$  | $r_{a2}$   | $r_{a3}$   | $r_{a4}$   | $r_{a5}$   | $r_{a6}$   | $r_{a7}$   |
|-----------|------------|------------|------------|------------|------------|------------|
| 2.0400000 | 1.7407111  | 1.3816634  | 1.2278749  | 1.0400000  | 0.97352665 | 0.96379139 |
| $A_1$     | $A_2$      | $A_3$      | $A_4$      | $A_5$      | $A_6$      | $A_7$      |
| 0.8975540 | -2.0922508 | -6.9015384 | 18.6591697 | 55.5572581 | 50.0000000 | 100.000000 |
|           |            |            |            |            |            | 0          |
| $r_{b1}$  | $r_{b2}$   | $r_{b3}$   | $r_{b4}$   | $r_{b5}$   | $m$        | $n$        |
| 2.0400000 | 1.7233905  | 1.4095758  | 1.2242095  | 1.0408000  | 5          | 7          |
| $B_1$     | $B_2$      | $B_3$      | $B_4$      | $B_5$      | $A$        |            |
| 2.7114616 | -5.9662845 | -19.695599 | 57.1589316 | 188.864045 | 0.00638918 |            |
|           |            | 3          |            | 1          |            |            |

**Table S4.** Effect of void size of spherical void on the mechanical performance of beryllium subject to uniaxial tension. The interatomic potential used is the MEAM potential.

| <b>Void-embedded</b>                 | <b>0</b>   | <b>12</b>   | <b>56</b>   | <b>159</b>  | <b>407</b>  |
|--------------------------------------|------------|-------------|-------------|-------------|-------------|
| Tensile toughness(J/m <sup>3</sup> ) | 1.559      | 1.455       | 1.279       | 0.995       | 0.942       |
| Young's modules(GPa)                 | 294.8      | 294.6       | 294.0       | 293.6       | 289.2       |
| Fracture stress(GPa)                 | 25.12      | 24.53       | 23.38       | 20.68       | 19.806      |
| Fracture strain                      | 0.109      | 0.105       | 0.098       | 0.086       | 0.084       |
| <b>Void-embedded</b>                 | <b>775</b> | <b>1339</b> | <b>2114</b> | <b>3148</b> | <b>4505</b> |
| Tensile toughness(J/m <sup>3</sup> ) | 0.959      | 0.869       | 0.819       | 0.743       | 0.666       |
| Young's modules(GPa)                 | 281.9      | 272.9       | 264.3       | 250.7       | 236.6       |
| Fracture stress(GPa)                 | 19.77      | 18.27       | 17.61       | 16.31       | 14.75       |
| Fracture strain                      | 0.086      | 0.083       | 0.082       | 0.08        | 0.078       |

**Table S5.** Effect of temperature on the mechanical performance of beryllium subject to uniaxial tension. The interatomic potential used is the MEAM potential.

| <b>Temperature(K)</b>                | <b>150</b> | <b>300</b> | <b>450</b> | <b>600</b> |
|--------------------------------------|------------|------------|------------|------------|
| Tensile toughness(J/m <sup>3</sup> ) | 1.361      | 0.959      | 0.622      | 0.360      |
| Young's modules(GPa)                 | 285.4      | 281.9      | 281.0      | 274.6      |
| Fracture stress(GPa)                 | 23.86      | 19.77      | 17.50      | 11.62      |
| Fracture strain                      | 0.103      | 0.086      | 0.069      | 0.052      |

**Table S6.** Effect of void size of spherical void on the mechanical performance of beryllium subject to uniaxial tension. The interatomic potential used is the Tersoff potential.

| <b>Void-embedded</b>                 | <b>0</b>   | <b>12</b>   | <b>56</b>   | <b>159</b>  | <b>407</b>  |
|--------------------------------------|------------|-------------|-------------|-------------|-------------|
| Tensile toughness(J/m <sup>3</sup> ) | 1.986      | 1.510       | 1.336       | 1.199       | 1.091       |
| Young's modules(GPa)                 | 192.1      | 191.7       | 189.2       | 190.6       | 186.7       |
| Fracture stress(GPa)                 | 37.77      | 33.95       | 31.87       | 29.42       | 27.29       |
| Fracture strain                      | 0.121      | 0.108       | 0.103       | 0.099       | 0.096       |
| <b>Void-embedded</b>                 | <b>775</b> | <b>1339</b> | <b>2114</b> | <b>3148</b> | <b>4505</b> |
| Tensile toughness(J/m <sup>3</sup> ) | 1.038      | 1.008       | 0.995       | 0.871       | 0.870       |
| Young's modules(GPa)                 | 188.3      | 176.5       | 172.7       | 164.5       | 155.9       |
| Fracture stress(GPa)                 | 25.92      | 25.27       | 24.51       | 22.26       | 21.75       |
| Fracture strain                      | 0.095      | 0.095       | 0.096       | 0.093       | 0.095       |

**Table S7.** Effect of temperature on the mechanical performance of beryllium subject to uniaxial tension. The interatomic potential used is the Tersoff potential.

| <b>Temperature(K)</b>                | <b>150</b> | <b>300</b> | <b>450</b> | <b>600</b> |
|--------------------------------------|------------|------------|------------|------------|
| Tensile toughness(J/m <sup>3</sup> ) | 1.157      | 1.038      | 0.948      | 0.853      |
| Young's modules(GPa)                 | 185.0      | 188.3      | 193.1      | 202.6      |
| Fracture stress(GPa)                 | 29.78      | 25.92      | 23.61      | 21.21      |
| Fracture strain                      | 0.102      | 0.095      | 0.089      | 0.083      |

**Table S8.** Effect of void size of spherical void on the mechanical performance of beryllium subject to uniaxial tension. The interatomic potential used is the Finnis-Sinclair potential.

| <b>Void-embedded</b>                  | <b>0</b>   | <b>12</b>   | <b>56</b>   | <b>159</b>  | <b>407</b>  |
|---------------------------------------|------------|-------------|-------------|-------------|-------------|
| Tensile toughness(J/m <sup>3</sup> )  | 1.035      | 1.071       | 0.993       | 0.907       | 0.844       |
| Young's modules(GPa)                  | 306.2      | 310.7       | 298.1       | 300.1       | 299.8       |
| Fracture stress(GPa)                  | 19.40      | 19.41       | 19.31       | 18.78       | 18.19       |
| Fracture strain                       | 0.089      | 0.091       | 0.087       | 0.083       | 0.08        |
| <b>Void-embedded</b>                  | <b>775</b> | <b>1339</b> | <b>2114</b> | <b>3148</b> | <b>4505</b> |
| Tensile toughness (J/m <sup>3</sup> ) | 0.790      | 0.733       | 0.709       | 0.695       | 0.689       |
| Young's modules (GPa)                 | 296.5      | 284.2       | 275.0       | 261.2       | 252.0       |
| Fracture stress (GPa)                 | 17.59      | 16.94       | 16.39       | 15.63       | 14.95       |
| Fracture strain                       | 0.078      | 0.076       | 0.076       | 0.077       | 0.079       |

**Table S9.** Effect of temperature on the mechanical performance of beryllium subject to uniaxial tension. The interatomic potential used is the Finnis-Sinclair potential.

| <b>Temperature (K)</b>                | <b>150</b> | <b>300</b> | <b>450</b> | <b>600</b> |
|---------------------------------------|------------|------------|------------|------------|
| Tensile toughness (J/m <sup>3</sup> ) | 0.796      | 0.790      | 0.757      | 0.687      |
| Young's modules (GPa)                 | 280.3      | 296.5      | 299.1      | 296.0      |
| Fracture stress (GPa)                 | 18.31      | 17.59      | 16.74      | 15.91      |
| Fracture strain                       | 0.074      | 0.078      | 0.076      | 0.072      |
